# Supplementary material for: A bifunctional primitive strategy induces enhancements of large second harmonic generation and wide UV transmittance in rare-earth borates containing [B5O10] groups
Source: Royal Society of Chemistry journal article supplement (doi:10.1039/d4sc01853b), 2024-01-01
Supplement: d4sc01853b1.pdf [file d4sc01853b1.pdf]

## Electronic Supporting Information (ESI)

### **A bifunctional primitive strategy induces enhancements of large second harmonic generation and wide UV transmittance in rare-earth borates containing [B<sub>5</sub>O<sub>10</sub>] groups**

Shuaifeng Li,<sup>a</sup> Weiming Li,<sup>a</sup> Xiang Li,<sup>a</sup> Guangsai Yang,<sup>a</sup> Ning Ye,<sup>a</sup> Zhanggui Hu,<sup>a</sup>

Yicheng Wu<sup>a</sup> and Conggang Li<sup>\*a, b</sup>

<sup>a</sup>Tianjin Key Laboratory of Functional Crystal Materials, Institute of Functional Crystal, Tianjin University of Technology, Tianjin 300384, China.

<sup>b</sup>State Key Laboratory of Crystal Materials, Shandong University, Jinan, 250100, China.

\*Corresponding author, E-mail address: cgli@email.tjut.edu.cn

## 1. Experimental Section

2. **Table S1** Crystallographic data and structural refinement for KBSBO and RSSBO.

3. **Table S2** The final atomic coordinates ( $\times 10^4$ ) and equivalent isotropic displacement parameters ( $\text{\AA}^2 \times 10^3$ ) for  $\text{K}_7\text{BaSc}_2\text{B}_{15}\text{O}_{30}$ ,  $U_{\text{eq}}$  is defined as one-third of the trace of the orthogonalized  $U_{ij}$  tensor, and the bond valence sum (BVS) for each atom in asymmetric unit.

4. **Table S3** The final atomic coordinates ( $\times 10^4$ ) and equivalent isotropic displacement parameters ( $\text{\AA}^2 \times 10^3$ ) for  $\text{Rb}_{21}\text{Sr}_{3.8}\text{Sc}_{5.2}\text{B}_{45}\text{O}_{90}$ ,  $U_{\text{eq}}$  is defined as one-third of the trace of the orthogonalized  $U_{ij}$  tensor, and the bond valence sum (BVS) for each atom in asymmetric unit.

5. **Table S4** Selected bond lengths ( $\text{\AA}$ ) and angles (deg.) for  $\text{K}_7\text{BaSc}_2\text{B}_{15}\text{O}_{30}$ .

6. **Table S5** Selected bond lengths ( $\text{\AA}$ ) and angles (deg.) for  $\text{Rb}_{21}\text{Sr}_{3.8}\text{Sc}_{5.2}\text{B}_{45}\text{O}_{90}$ .

7. **Table S6** Direction and magnitude of the dipole moments in  $\text{K}_7\text{BaSc}_2\text{B}_{15}\text{O}_{30}$  and  $\text{Rb}_{21}\text{Sr}_{3.8}\text{Sc}_{5.2}\text{B}_{45}\text{O}_{90}$  compounds.

8. **Table S7** Distortion direction and eccentricity degree ( $\Delta d$ ) of the dipole moments in the  $\text{Ba}/\text{SrO}_6$  and  $\text{ScO}_6$  octahedra.

9. **Table S8** The investigation of B-O bond lengths in  $\text{BO}_3$  units for the inorganic metal borates.

10. **Fig. S1** (a-b) Powder X-ray diffraction patterns results for melted  $\text{K}_7\text{BaSc}_2\text{B}_{15}\text{O}_{30}$  and  $\text{Rb}_{21}\text{Sr}_{3.8}\text{Sc}_{5.2}\text{B}_{45}\text{O}_{90}$ , respectively.

11. **Fig. S2** (a-b) The partial enlargement of  $\text{B}_5\text{O}_{10}$  units in KBSBO and RSSBO, respectively.

12. **Fig. S3** (a-b) The optical band gap values for KBSBO and RSSBO by Tauc plots absorption spectrometry, respectively.

## Experimental Section

**Compounds preparation.** Polycrystalline samples of  $K_7BaSc_2B_{15}O_{30}$  and  $Rb_{21}Sr_{3.8}Sc_{5.2}B_{45}O_{90}$  were prepared by using solid-state techniques with a stoichiometric ratio of  $K_2CO_3/Rb_2CO_3$ ,  $BaCO_3/SrCO_3$ ,  $Sc_2O_3$ , and  $H_3BO_3$ . The mixtures were gradually heated up to 700-750°C for both compounds with several intermediate grindings and mixings, followed by a duration of 72 hours at 700-750°C to ensure complete reactions. Subsequently, the mixtures were cooled to room temperature at a rate of 10°C. Ultimately, the reaction products were synthesized. The purities of the two products were proved by the powder X-ray diffraction texts. Single crystals of  $K_7BaSc_2B_{15}O_{30}$  and  $Rb_{21}Sr_{3.8}Sc_{5.2}B_{45}O_{90}$  were prepared by the high-temperature solution method, by utilizing  $K_2CO_3/Rb_2CO_3-H_3BO_3$  as a flux.

**Powder X-ray diffraction (PXRD).** The PXRD measurements of the  $K_7BaSc_2B_{15}O_{30}$  and  $Rb_{21}Sr_{3.8}Sc_{5.2}B_{45}O_{90}$  compounds were conducted utilizing a Rigaku SmartLab 9kW diffractometer equipped with a diffracted monochromator setting for Cu  $K\alpha$  radiation ( $\lambda = 1.5418 \text{ \AA}$ ). The experimental data were characterized at ambient temperature within the  $2\theta$  range of 10–70°, at a step size of 0.01° and a step time of 2 s.

**Thermal Analysis.** Thermal gravimetric analysis (TG) and differential scanning calorimetry (DSC) for the  $K_7BaSc_2B_{15}O_{30}$  and  $Rb_{21}Sr_{3.8}Sc_{5.2}B_{45}O_{90}$  compounds were measured on a HITACHI STA200 TG/DSC analyzer. The polycrystalline samples were placed in an alumina crucible and heated up to 1000 °C at a rate of 10 °C/ min in the  $N_2$  atmosphere.

**Single-Crystal X-ray Diffraction.** The crystallographic data of  $K_7BaSc_2B_{15}O_{30}$  and  $Rb_{21}Sr_{3.8}Sc_{5.2}B_{45}O_{90}$  crystals were recorded on a Bruker SMART APEX II 4K CCD diffractometer Mo  $K\alpha$  radiation ( $\lambda = 0.71073 \text{ \AA}$ ) at 298(2) K. The APEX III software with multiple scan models was applied to carry out the data integration and absorption corrections. The preliminary crystal models were solved by direct methods and refined via the SHELXTL system.<sup>1-2</sup> The structural symmetry was determined by using the PLATON program for eliminating symmetry elements to ensure the high degree of symmetry in the crystal structure.<sup>3</sup> The extended structural data including the values of the bond valence sum (BVS), equivalent isotropic displacement parameters, and the selected bond distances ( $\text{\AA}$ ) and angles (deg.) are available in Tables S3 and S4.

**Transmission Spectrum.** The UV–vis–NIR diffuse reflectance spectra for  $K_7BaSc_2B_{15}O_{30}$  and  $Rb_{21}Sr_{3.8}Sc_{5.2}B_{45}O_{90}$  were performed using a Hitachi UH4150 spectrophotometer with a wavelength range from 190 to 2000 nm at room temperature. Barium sulfate was utilized as the reference standard for the diffuse reflectance measurements. The experimental band gaps of the title compounds can be determined based on the Kubelka–Munk function:  $F(R) = (1-R)^2/2R = K/S$ , where  $R$  represents reflectance,  $K$  represents absorption, and  $S$  represents scattering.<sup>4</sup> In addition, the infrared spectrum of the two compounds were available at room temperature by using a STA6000-TL9000 FTIR spectrometer in the measured range of 400–4000  $\text{cm}^{-1}$ . To

prepare the test samples, the two compounds were completely mixed with KBr at a mass ratio of about 1 : 150, respectively.

**Second harmonic generation (SHG) measurement.** The powder SHG tests of the title compounds were performed by the Kurtz–Perry method using a Q-switched Nd:YAG laser with a wavelength of 1064 nm.<sup>5</sup> The different particle size ranges (50–75, 75–108, 108–120, 120–150, 150–180, and 180–215  $\mu\text{m}$ ) were available through grinding and filtering polycrystalline samples of the two compounds. Meanwhile commercial  $\text{KH}_2\text{PO}_4$  (KDP) single crystals were sieved into the consistent particle size ranges as the reference sample.

**Computational details.** The band structures, the density of states (DOS) as well as partial density of states (PDOS) were calculated by the density functional theory (DFT) method, as implemented in the CASTEP package.<sup>6</sup> To accurately capture the electronic and structural properties, the Perdew–Burke–Ernzerhof (PBE) functional, formulated within the framework of generalized gradient approximation (GGA), was employed to account for the exchange–correlation energy.<sup>7–8</sup> The kinetic energy cutoffs of 750 and 810 eV were chosen for  $\text{K}_7\text{BaSc}_2\text{B}_{15}\text{O}_{30}$  and  $\text{Rb}_{21}\text{Sr}_{3.8}\text{Sc}_{5.2}\text{B}_{45}\text{O}_{90}$ , respectively. The numerical integration of the Brillouin zone was performed using Monkhorst-Pack k-point sampling of  $3 \times 3 \times 3$  and  $4 \times 4 \times 4$  for  $\text{K}_7\text{BaSc}_2\text{B}_{15}\text{O}_{30}$  and  $\text{Rb}_{21}\text{Sr}_{3.8}\text{Sc}_{5.2}\text{B}_{45}\text{O}_{90}$ , respectively.<sup>9</sup> Under the norm-conserving pseudopotential (NCP), the following orbital electrons were treated as valence electrons: K  $4s^1$ , Rb  $5s^1$ , Ba  $6s^2$ , Sr  $5s^2$ , Sc  $3d^1 4s^2$ , B  $2s^2 2p^1$ , and O  $2s^2 2p^4$ .

**Table S1** Crystallographic data and structural refinement for KBSBO and RSSBO.

| Empirical formula                                                   | K <sub>7</sub> BaSc <sub>2</sub> B <sub>15</sub> O <sub>30</sub> | Rb <sub>21</sub> Sr <sub>3.8</sub> Sc <sub>5.2</sub> B <sub>45</sub> O <sub>90</sub> |
|---------------------------------------------------------------------|------------------------------------------------------------------|--------------------------------------------------------------------------------------|
| formula weight                                                      | 13717.30                                                         | 4288.08                                                                              |
| temperature (K)                                                     | 273(2)                                                           | 273(2)                                                                               |
| wavelength (Å)                                                      | 0.71073                                                          | 0.71073                                                                              |
| crystal system                                                      | trigonal                                                         | trigonal                                                                             |
| space group                                                         | <i>R</i> 32                                                      | <i>R</i> 32                                                                          |
| <i>a</i> (Å)                                                        | 13.0897(10)                                                      | 13.367 (3)                                                                           |
| <i>b</i> (Å)                                                        | 13.0897(10)                                                      | 13.367 (3)                                                                           |
| <i>c</i> (Å)                                                        | 60.7234 (7)                                                      | 14.906 (3)                                                                           |
| $\beta$ (°)                                                         | 90°                                                              | 90°                                                                                  |
| $\gamma$ (°)                                                        | 120°                                                             | 120°                                                                                 |
| Volume (Å <sup>3</sup> )                                            | 9010.4(2)                                                        | 2306.4 (14)                                                                          |
| <i>Z</i>                                                            | 1                                                                | 1                                                                                    |
| density (g/cm <sup>3</sup> )                                        | 2.528                                                            | 3.087                                                                                |
| <i>F</i> (000)                                                      | 6552                                                             | 1976                                                                                 |
| <i>R</i> (int)                                                      | 0.0427                                                           | 0.0336                                                                               |
| Completeness (%)                                                    | 99.7                                                             | 99.6                                                                                 |
| GOF on ( <i>F</i> <sup>2</sup> )                                    | 1.053                                                            | 1.088                                                                                |
| Final <i>R</i> indices<br>[ <i>I</i> > 2σ( <i>I</i> )] <sup>a</sup> | <i>R</i> <sub>1</sub> =0.0251, <i>wR</i> <sub>2</sub> =0.0571    | <i>R</i> <sub>1</sub> =0.0167, <i>wR</i> <sub>2</sub> =0.0378                        |
| <i>R</i> indices (all data) <sup>a</sup>                            | <i>R</i> <sub>1</sub> =0.0311, <i>wR</i> <sub>2</sub> =0.0600    | <i>R</i> <sub>1</sub> =0.0189, <i>wR</i> <sub>2</sub> =0.0385                        |
| CCDC                                                                | 2335307                                                          | 2335374                                                                              |

<sup>a</sup> $R_1 = \sum ||F_o| - |F_c|| / \sum |F_o|$  and  $wR_2 = [\sum w(F_o^2 - F_c^2)^2 / \sum w(F_o^2)^2]^{1/2}$

**Table S2** The final atomic coordinates ( $\times 10^4$ ) and equivalent isotropic displacement parameters ( $\text{\AA}^2 \times 10^3$ ) for  $\text{K}_7\text{BaSc}_2\text{B}_{15}\text{O}_{30}$ ,  $U_{\text{eq}}$  is defined as one-third of the trace of the orthogonalized  $U_{ij}$  tensor, and the bond valence sum (BVS) for each atom in asymmetric unit.

| Atom  | x        | y        | z       | $U_{\text{eq}}$ | BVS  |
|-------|----------|----------|---------|-----------------|------|
| Ba(1) | 10000    | 10000    | 4325(1) | 15(1)           | 2.14 |
| Ba(2) | 6667     | 3333     | 4601(1) | 32(1)           | 1.95 |
| Sc(1) | 6667     | 3333     | 5193(1) | 8(1)            | 2.99 |
| Sc(2) | 3333     | -3333    | 5986(1) | 8(1)            | 2.87 |
| Sc(3) | 0        | 0        | 6257(1) | 9(1)            | 3.05 |
| Sc(4) | 6667     | 3333     | 6559(1) | 8(1)            | 2.94 |
| K(1)  | 11337(1) | 7898(1)  | 4572(1) | 31(1)           | 0.94 |
| O(1)  | 9357(2)  | 7971(2)  | 4494(1) | 20(1)           | 1.06 |
| K(2)  | 8440(1)  | 6655(1)  | 4139(1) | 33(1)           | 0.97 |
| K(3)  | 10000    | 10000    | 5000    | 26(1)           | 1.42 |
| K(4)  | 4902(2)  | 4902(2)  | 5000    | 40(1)           | 0.76 |
| K(5)  | 6667     | 3333     | 5840(1) | 22(1)           | 1.33 |
| K(6)  | 5392(1)  | -10(1)   | 6264(1) | 22(1)           | 1.04 |
| K(7)  | 3333     | -3333    | 6667    | 22(1)           | 1.32 |
| K(8)  | 3333     | 1789(1)  | 6667    | 27(1)           | 1.12 |
| O(2)  | 8305(3)  | 8071(3)  | 4806(1) | 23(1)           | 1.52 |
| O(3)  | 7399(3)  | 6384(3)  | 5050(1) | 26(1)           | 1.56 |
| O(4)  | 7591(2)  | 4725(2)  | 4963(1) | 22(1)           | 1.12 |
| O(5)  | 8328(5)  | 6315(3)  | 4722(1) | 54(1)           | 1.58 |
| O(6)  | 691(3)   | -660(3)  | 6507(1) | 16(1)           | 1.10 |
| O(7)  | 2280(2)  | -711(3)  | 6674(1) | 17(1)           | 1.55 |
| O(8)  | 3338(2)  | -1488(2) | 6471(1) | 15(1)           | 1.56 |
| O(9)  | 2372(2)  | -2747(2) | 6166(1) | 15(1)           | 1.11 |
| O(10) | 1521(3)  | -1732(3) | 6338(1) | 22(1)           | 1.57 |
| O(11) | 5962(3)  | 1753(2)  | 5369(1) | 20(1)           | 1.10 |

|       |         |          |         |       |      |
|-------|---------|----------|---------|-------|------|
| O(12) | 4736(3) | 1483(2)  | 5676(1) | 18(1) | 1.56 |
| O(13) | 4004(3) | -290(2)  | 5892(1) | 19(1) | 1.54 |
| O(14) | 5021(4) | -86(2)   | 5554(1) | 25(1) | 1.55 |
| O(15) | 4135(3) | -1898(2) | 5751(1) | 20(1) | 1.09 |
| O(16) | 1424(2) | 910(3)   | 6054(1) | 18(1) | 1.11 |
| O(17) | 2956(2) | 768(3)   | 5879(1) | 23(1) | 1.51 |
| O(18) | 4857(2) | 1585(2)  | 6068(1) | 16(1) | 1.53 |
| O(19) | 5163(2) | 2792(2)  | 6385(1) | 14(1) | 1.10 |
| O(20) | 3341(2) | 1905(3)  | 6206(1) | 23(1) | 1.59 |
| B(1)  | 2546(4) | 1181(5)  | 6046(1) | 14(1) | 3.05 |
| B(2)  | 1488(4) | -1023(4) | 6506(1) | 13(1) | 3.03 |
| B(3)  | 4372(4) | -789(4)  | 5734(1) | 14(1) | 3.01 |
| B(4)  | 8690(6) | 7495(4)  | 4669(1) | 19(1) | 3.05 |
| B(5)  | 3333    | -839(5)  | 6667    | 14(1) | 3.08 |
| B(6)  | 7764(5) | 5787(4)  | 4918(1) | 19(1) | 3.12 |
| B(7)  | 4130(4) | 879(4)   | 5877(1) | 17(1) | 3.08 |
| B(8)  | 7544(6) | 7544(6)  | 5000    | 20(2) | 3.07 |
| B(9)  | 4497(4) | 2098(4)  | 6220(1) | 14(1) | 3.03 |
| B(10) | 2436(4) | -2002(4) | 6321(1) | 12(1) | 3.02 |
| B(11) | 5252(4) | 1079(4)  | 5529(1) | 15(1) | 3.01 |

---

**Table S3** The final atomic coordinates ( $\times 10^4$ ) and equivalent isotropic displacement parameters ( $\text{\AA}^2 \times 10^3$ ) for  $\text{Rb}_{21}\text{Sr}_{3.8}\text{Sc}_{5.2}\text{B}_{45}\text{O}_{90}$ ,  $U_{\text{eq}}$  is defined as one-third of the trace of the orthogonalized  $U_{ij}$  tensor, and the bond valence sum (BVS) for each atom in asymmetric unit.

| Atom         | x        | y        | z        | $U_{\text{eq}}$ | BVS       |
|--------------|----------|----------|----------|-----------------|-----------|
| Sr(1)/ Sc(1) | 6667     | 3333     | 6084(1)  | 13(1)           | 3.19/2.40 |
| Sr(2)/ Sc(2) | 10000    | 10000    | 5000     | 16(1)           | 2.33/3.18 |
| Rb(1)        | 10000    | 4578(1)  | 5000     | 25(1)           | 1.21      |
| Rb(2)        | 6667     | 3333     | 3333     | 30(1)           | 1.2       |
| Rb(3)        | 8098(1)  | 6667     | 6667     | 30(1)           | 1.06      |
| O(1)         | 8602(2)  | 5284(2)  | 4129(2)  | 23(1)           | 1.58      |
| O(2)         | 9371(3)  | 7070(2)  | 3294(2)  | 31(1)           | 1.54      |
| O(3)/O(6)    | 9218(9)  | 8622(7)  | 3739(6)  | 23(1)           | 0.95/1.08 |
|              | 9284(10) | 8600(8)  | 4120(6)  | 23(1)           |           |
| O(4)/O(7)    | 8266(10) | 6749(7)  | 4662(13) | 31(2)           | 1.52/1.71 |
|              | 8120(30) | 6760(20) | 4370(20) | 31(2)           |           |
| O(5)         | 7283(3)  | 4938(3)  | 5309(2)  | 36(1)           | 1.07      |
| B(1)         | 9246(5)  | 5913(5)  | 3333     | 20(1)           | 3.1       |
| B(2)         | 8028(4)  | 5622(4)  | 4690(3)  | 25(1)           | 3.15/2.80 |
| B(3)         | 8966(4)  | 7501(4)  | 3935(4)  | 34(1)           | 3.48/2.77 |



**Table S4** Selected bond lengths (Å) and angles (deg.) for  $K_7BaSc_2B_{15}O_{30}$ .

|                |          |               |          |
|----------------|----------|---------------|----------|
| Ba(1)-O(1)     | 2.565(3) | Sc(4)-O(19)   | 2.022(3) |
| Ba(1)-O(1)#1   | 2.565(3) | Sc(4)-O(6)#17 | 2.233(2) |
| Ba(1)-O(1)#2   | 2.565(3) | Sc(4)-O(6)#18 | 2.233(2) |
| Ba(1)-O(16)#3  | 2.820(2) | Sc(4)-O(6)#19 | 2.233(2) |
| Ba(1)-O(16)#4  | 2.820(2) | K(1)-O(12)#3  | 2.680(3) |
| Ba(1)-O(16)#5  | 2.820(2) | K(1)-O(1)     | 2.684(3) |
| Ba(2)-O(15)#6  | 2.691(2) | K(1)-O(3)#20  | 2.770(3) |
| Ba(2)-O(15)#7  | 2.691(2) | K(1)-O(11)#7  | 2.869(4) |
| Ba(2)-O(15)#5  | 2.691(2) | K(1)-O(2)#1   | 3.098(3) |
| Ba(2)-O(4)#8   | 2.723(3) | K(1)-O(17)#3  | 3.141(3) |
| Ba(2)-O(4)#9   | 2.723(3) | K(1)-O(14)#7  | 3.351(4) |
| Ba(2)-O(4)     | 2.723(3) | O(1)-B(4)     | 1.320(5) |
| Sc(1)-O(11)#8  | 2.088(2) | O(1)-K(2)     | 2.642(3) |
| Sc(1)-O(11)#9  | 2.088(2) | K(2)-O(9)#5   | 2.738(3) |
| Sc(1)-O(11)    | 2.088(2) | K(2)-O(13)#5  | 2.800(3) |
| Sc(1)-O(4)#8   | 2.127(3) | K(2)-O(10)#5  | 2.897(3) |
| Sc(1)-O(4)     | 2.127(3) | K(2)-O(17)#5  | 2.901(3) |
| Sc(1)-O(4)#9   | 2.127(3) | K(2)-O(15)#7  | 3.171(4) |
| Sc(2)-O(9)     | 2.083(2) | K(2)-O(16)#3  | 3.201(3) |
| Sc(2)-O(9)#11  | 2.083(3) | K(3)-O(2)#21  | 2.662(3) |
| Sc(2)-O(9)#12  | 2.083(3) | K(3)-O(2)#20  | 2.662(3) |
| Sc(2)-O(15)    | 2.165(2) | K(3)-O(2)#22  | 2.662(3) |
| Sc(2)-O(15)#12 | 2.165(2) | K(3)-O(2)#1   | 2.662(3) |
| Sc(2)-O(15)#11 | 2.165(2) | K(3)-O(2)#2   | 2.662(3) |
| Sc(3)-O(16)    | 2.049(3) | K(3)-O(2)     | 2.662(3) |
| Sc(3)-O(16)#14 | 2.049(3) | K(4)-O(3)     | 2.863(4) |
| Sc(3)-O(16)#15 | 2.049(3) | K(4)-O(3)#22  | 2.863(4) |
| Sc(3)-O(6)     | 2.157(2) | K(4)-O(4)#8   | 2.948(3) |
| Sc(3)-O(6)#14  | 2.157(2) | K(4)-O(4)#23  | 2.948(3) |
| Sc(3)-O(6)#15  | 2.157(2) | K(4)-O(11)#5  | 2.994(3) |
| Sc(4)-O(19)#8  | 2.022(3) | K(4)-O(11)#9  | 2.994(3) |
| Sc(4)-O(19)#9  | 2.022(3) | K(4)-O(14)#9  | 3.368(3) |

|               |          |                      |           |
|---------------|----------|----------------------|-----------|
| K(4)-O(14)#5  | 3.368(3) | O(5)-B(6)            | 1.386(5)  |
| K(5)-O(12)#8  | 2.669(3) | O(5)-B(4)            | 1.408(5)  |
| K(5)-O(12)#9  | 2.669(3) | O(6)-B(2)            | 1.345(5)  |
| K(5)-O(12)    | 2.669(3) | O(7)-B(2)            | 1.363(5)  |
| K(5)-O(18)#8  | 2.709(3) | O(7)-B(5)            | 1.471(5)  |
| K(5)-O(18)#9  | 2.709(3) | O(8)-B(10)           | 1.370(5)  |
| K(5)-O(18)    | 2.709(3) | O(8)-B(5)            | 1.464(5)  |
| K(6)-O(8)     | 2.709(3) | O(9)-B(10)           | 1.328(5)  |
| K(6)-O(18)    | 2.782(3) | O(10)-B(2)           | 1.397(5)  |
| K(6)-O(13)    | 2.806(3) | O(10)-B(10)          | 1.411(5)  |
| K(6)-O(9)#11  | 2.879(3) | O(11)-B(11)          | 1.330(5)  |
| K(6)-O(7)#18  | 2.881(3) | O(12)-B(11)          | 1.375(5)  |
| K(6)-O(19)#8  | 2.914(3) | O(12)-B(7)           | 1.455(5)  |
| K(6)-O(20)#8  | 3.086(3) | O(13)-B(3)           | 1.378(5)  |
| K(6)-O(10)#11 | 3.280(4) | O(13)-B(7)           | 1.457(5)  |
| K(7)-O(8)     | 2.691(3) | O(14)-B(11)          | 1.406(5)  |
| K(7)-O(8)#12  | 2.691(3) | O(14)-B(3)           | 1.408(5)  |
| K(7)-O(8)#11  | 2.691(3) | O(15)-B(3)           | 1.327(5)  |
| K(7)-O(8)#24  | 2.691(3) | O(16)-B(1)           | 1.329(5)  |
| K(7)-O(8)#25  | 2.691(3) | O(17)-B(1)           | 1.375(6)  |
| K(7)-O(8)#18  | 2.691(3) | O(17)-B(7)           | 1.470(5)  |
| K(8)-O(19)    | 2.690(3) | O(18)-B(9)           | 1.359(5)  |
| K(8)-O(19)#18 | 2.690(3) | O(18)-B(7)           | 1.492(5)  |
| K(8)-O(20)    | 2.798(3) | O(19)-B(9)           | 1.341(5)  |
| K(8)-O(20)#18 | 2.798(3) | O(20)-B(1)           | 1.396(5)  |
| K(8)-O(7)#18  | 2.846(3) | O(20)-B(9)           | 1.406(5)  |
| K(8)-O(7)     | 2.846(3) | O(1)-Ba(1)-O(1)#1    | 105.05(7) |
| K(8)-O(6)#14  | 3.392(4) | O(1)-Ba(1)-O(1)#2    | 105.05(7) |
| K(8)-O(6)#19  | 3.392(4) | O(1)#1-Ba(1)-O(1)#2  | 105.05(7) |
| O(2)-B(4)     | 1.374(6) | O(1)-Ba(1)-O(16)#3   | 85.01(8)  |
| O(2)-B(8)     | 1.473(5) | O(1)#1-Ba(1)-O(16)#3 | 104.10(9) |
| O(3)-B(6)     | 1.364(6) | O(1)#2-Ba(1)-O(16)#3 | 145.27(8) |
| O(3)-B(8)     | 1.465(5) | O(1)-Ba(1)-O(16)#4   | 145.27(8) |
| O(4)-B(6)     | 1.321(5) | O(1)#1-Ba(1)-O(16)#4 | 85.02(9)  |

|                       |            |                         |            |
|-----------------------|------------|-------------------------|------------|
| O(1)#2-Ba(1)-O(16)#4  | 104.10(9)  | O(11)-Sc(1)-O(4)#9      | 83.22(12)  |
| O(16)#3-Ba(1)-O(16)#4 | 60.26(8)   | O(4)#8-Sc(1)-O(4)#9     | 81.69(12)  |
| O(1)-Ba(1)-O(16)#5    | 104.10(9)  | O(4)-Sc(1)-O(4)#9       | 81.69(12)  |
| O(1)#1-Ba(1)-O(16)#5  | 145.27(9)  | O(9)-Sc(2)-O(9)#11      | 94.83(10)  |
| O(1)#2-Ba(1)-O(16)#5  | 85.02(9)   | O(9)-Sc(2)-O(9)#12      | 94.83(10)  |
| O(16)#3-Ba(1)-O(16)#5 | 60.26(8)   | O(9)#11-Sc(2)-O(9)#12   | 94.83(10)  |
| O(16)#4-Ba(1)-O(16)#5 | 60.26(8)   | O(9)-Sc(2)-O(15)        | 98.41(12)  |
| O(15)#6-Ba(2)-O(15)#7 | 63.34(8)   | O(9)#11-Sc(2)-O(15)     | 85.34(12)  |
| O(15)#6-Ba(2)-O(15)#5 | 63.34(8)   | O(9)#12-Sc(2)-O(15)     | 166.70(12) |
| O(15)#7-Ba(2)-O(15)#5 | 63.34(8)   | O(9)-Sc(2)-O(15)#12     | 85.34(12)  |
| O(15)#6-Ba(2)-O(4)#8  | 123.17(10) | O(9)#11-Sc(2)-O(15)#12  | 166.70(13) |
| O(15)#7-Ba(2)-O(4)#8  | 171.22(11) | O(9)#12-Sc(2)-O(15)#12  | 98.41(13)  |
| O(15)#5-Ba(2)-O(4)#8  | 113.03(9)  | O(15)-Sc(2)-O(15)#12    | 81.49(10)  |
| O(15)#6-Ba(2)-O(4)#9  | 113.03(9)  | O(9)-Sc(2)-O(15)#11     | 166.70(12) |
| O(15)#7-Ba(2)-O(4)#9  | 123.17(9)  | O(9)#11-Sc(2)-O(15)#11  | 98.41(13)  |
| O(15)#5-Ba(2)-O(4)#9  | 171.22(11) | O(9)#12-Sc(2)-O(15)#11  | 85.34(12)  |
| O(4)#8-Ba(2)-O(4)#9   | 61.43(9)   | O(15)-Sc(2)-O(15)#11    | 81.49(10)  |
| O(15)#6-Ba(2)-O(4)    | 171.22(11) | O(15)#12-Sc(2)-O(15)#11 | 81.49(10)  |
| O(15)#7-Ba(2)-O(4)    | 113.03(9)  | O(16)-Sc(3)-O(16)#14    | 87.38(10)  |
| O(15)#5-Ba(2)-O(4)    | 123.17(9)  | O(16)-Sc(3)-O(16)#15    | 87.38(10)  |
| O(4)#8-Ba(2)-O(4)     | 61.43(9)   | O(16)#14-Sc(3)-O(16)#15 | 87.38(10)  |
| O(4)#9-Ba(2)-O(4)     | 61.43(9)   | O(16)-Sc(3)-O(6)        | 102.44(12) |
| O(11)#8-Sc(1)-O(11)#9 | 96.21(10)  | O(16)#14-Sc(3)-O(6)     | 170.11(12) |
| O(11)#8-Sc(1)-O(11)   | 96.20(10)  | O(16)#15-Sc(3)-O(6)     | 94.17(11)  |
| O(11)#9-Sc(1)-O(11)   | 96.20(10)  | O(16)-Sc(3)-O(6)#14     | 94.16(12)  |
| O(11)#8-Sc(1)-O(4)#8  | 164.59(13) | O(16)#14-Sc(3)-O(6)#14  | 102.45(12) |
| O(11)#9-Sc(1)-O(4)#8  | 83.22(12)  | O(16)#15-Sc(3)-O(6)#14  | 170.10(12) |
| O(11)-Sc(1)-O(4)#8    | 99.17(13)  | O(6)-Sc(3)-O(6)#14      | 75.95(9)   |
| O(11)#8-Sc(1)-O(4)    | 83.22(12)  | O(16)-Sc(3)-O(6)#15     | 170.10(12) |
| O(11)#9-Sc(1)-O(4)    | 99.16(13)  | O(16)#14-Sc(3)-O(6)#15  | 94.17(11)  |
| O(11)-Sc(1)-O(4)      | 164.60(13) | O(16)#15-Sc(3)-O(6)#15  | 102.44(12) |
| O(4)#8-Sc(1)-O(4)     | 81.69(12)  | O(6)-Sc(3)-O(6)#15      | 75.95(9)   |
| O(11)#8-Sc(1)-O(4)#9  | 99.16(12)  | O(6)#14-Sc(3)-O(6)#15   | 75.95(9)   |
| O(11)#9-Sc(1)-O(4)#9  | 164.60(13) | O(19)#8-Sc(4)-O(19)#9   | 95.38(10)  |

|                       |            |                      |            |
|-----------------------|------------|----------------------|------------|
| O(19)#8-Sc(4)-O(19)   | 95.38(10)  | O(17)#3-K(1)-O(14)#7 | 105.54(8)  |
| O(19)#9-Sc(4)-O(19)   | 95.38(10)  | O(1)-K(2)-O(9)#5     | 164.29(10) |
| O(19)#8-Sc(4)-O(6)#17 | 99.40(12)  | O(1)-K(2)-O(13)#5    | 113.01(9)  |
| O(19)#9-Sc(4)-O(6)#17 | 90.83(12)  | O(9)#5-K(2)-O(13)#5  | 72.79(8)   |
| O(19)-Sc(4)-O(6)#17   | 163.37(11) | O(1)-K(2)-O(10)#5    | 142.63(9)  |
| O(19)#8-Sc(4)-O(6)#18 | 90.83(11)  | O(9)#5-K(2)-O(10)#5  | 49.44(7)   |
| O(19)#9-Sc(4)-O(6)#18 | 163.37(11) | O(13)#5-K(2)-O(10)#5 | 86.66(10)  |
| O(19)-Sc(4)-O(6)#18   | 99.40(12)  | O(1)-K(2)-O(17)#5    | 83.71(9)   |
| O(6)#17-Sc(4)-O(6)#18 | 72.91(9)   | O(9)#5-K(2)-O(17)#5  | 109.73(9)  |
| O(19)#8-Sc(4)-O(6)#19 | 163.37(11) | O(13)#5-K(2)-O(17)#5 | 49.48(8)   |
| O(19)#9-Sc(4)-O(6)#19 | 99.40(12)  | O(10)#5-K(2)-O(17)#5 | 86.66(10)  |
| O(19)-Sc(4)-O(6)#19   | 90.83(11)  | O(1)-K(2)-O(15)#7    | 106.80(8)  |
| O(6)#17-Sc(4)-O(6)#19 | 72.91(9)   | O(9)#5-K(2)-O(15)#7  | 57.77(7)   |
| O(6)#18-Sc(4)-O(6)#19 | 72.91(9)   | O(13)#5-K(2)-O(15)#7 | 91.10(8)   |
| O(12)#3-K(1)-O(1)     | 131.59(9)  | O(10)#5-K(2)-O(15)#7 | 104.09(8)  |
| O(12)#3-K(1)-O(3)#20  | 94.68(9)   | O(17)#5-K(2)-O(15)#7 | 138.98(8)  |
| O(1)-K(1)-O(3)#20     | 117.91(10) | O(1)-K(2)-O(16)#3    | 76.49(8)   |
| O(12)#3-K(1)-O(11)#7  | 77.00(8)   | O(9)#5-K(2)-O(16)#3  | 111.93(8)  |
| O(1)-K(1)-O(11)#7     | 131.87(9)  | O(13)#5-K(2)-O(16)#3 | 128.90(8)  |
| O(3)#20-K(1)-O(11)#7  | 91.25(9)   | O(10)#5-K(2)-O(16)#3 | 66.70(7)   |
| O(12)#3-K(1)-O(2)#1   | 102.96(9)  | O(17)#5-K(2)-O(16)#3 | 84.70(8)   |
| O(1)-K(1)-O(2)#1      | 79.36(9)   | O(15)#7-K(2)-O(16)#3 | 136.08(8)  |
| O(3)#20-K(1)-O(2)#1   | 47.39(8)   | O(2)#21-K(3)-O(2)#20 | 101.89(7)  |
| O(11)#7-K(1)-O(2)#1   | 138.63(8)  | O(2)#21-K(3)-O(2)#22 | 101.89(7)  |
| O(12)#3-K(1)-O(17)#3  | 47.38(8)   | O(2)#20-K(3)-O(2)#22 | 101.89(7)  |
| O(1)-K(1)-O(17)#3     | 84.59(8)   | O(2)#21-K(3)-O(2)#1  | 115.74(13) |
| O(3)#20-K(1)-O(17)#3  | 118.84(9)  | O(2)#20-K(3)-O(2)#1  | 53.97(12)  |
| O(11)#7-K(1)-O(17)#3  | 115.41(8)  | O(2)#22-K(3)-O(2)#1  | 137.89(13) |
| O(2)#1-K(1)-O(17)#3   | 90.38(8)   | O(2)#21-K(3)-O(2)#2  | 53.97(12)  |
| O(12)#3-K(1)-O(14)#7  | 96.95(8)   | O(2)#20-K(3)-O(2)#2  | 137.89(13) |
| O(1)-K(1)-O(14)#7     | 89.75(9)   | O(2)#22-K(3)-O(2)#2  | 115.74(13) |
| O(3)#20-K(1)-O(14)#7  | 128.41(9)  | O(2)#1-K(3)-O(2)#2   | 101.89(7)  |
| O(11)#7-K(1)-O(14)#7  | 43.97(7)   | O(2)#21-K(3)-O(2)    | 137.89(13) |
| O(2)#1-K(1)-O(14)#7   | 159.86(8)  | O(2)#20-K(3)-O(2)    | 115.74(13) |

|                      |            |                      |           |
|----------------------|------------|----------------------|-----------|
| O(2)#22-K(3)-O(2)    | 53.98(12)  | O(12)#8-K(5)-O(18)#8 | 52.63(8)  |
| O(2)#1-K(3)-O(2)     | 101.89(7)  | O(12)#9-K(5)-O(18)#8 | 125.76(9) |
| O(2)#2-K(3)-O(2)     | 101.89(7)  | O(12)-K(5)-O(18)#8   | 126.47(9) |
| O(3)-K(4)-O(3)#22    | 49.10(13)  | O(12)#8-K(5)-O(18)#9 | 126.47(9) |
| O(3)-K(4)-O(4)#8     | 88.37(8)   | O(12)#9-K(5)-O(18)#9 | 52.63(8)  |
| O(3)#22-K(4)-O(4)#8  | 134.42(10) | O(12)-K(5)-O(18)#9   | 125.76(9) |
| O(3)-K(4)-O(4)#23    | 134.42(10) | O(18)#8-K(5)-O(18)#9 | 96.25(8)  |
| O(3)#22-K(4)-O(4)#23 | 88.37(8)   | O(12)#8-K(5)-O(18)   | 125.76(9) |
| O(4)#8-K(4)-O(4)#23  | 136.68(13) | O(12)#9-K(5)-O(18)   | 126.47(9) |
| O(3)-K(4)-O(11)#5    | 109.92(11) | O(12)-K(5)-O(18)     | 52.63(8)  |
| O(3)#22-K(4)-O(11)#5 | 69.43(10)  | O(18)#8-K(5)-O(18)   | 96.25(8)  |
| O(4)#8-K(4)-O(11)#5  | 124.10(8)  | O(18)#9-K(5)-O(18)   | 96.25(8)  |
| O(4)#23-K(4)-O(11)#5 | 56.20(8)   | O(8)-K(6)-O(18)      | 101.63(9) |
| O(3)-K(4)-O(11)#9    | 69.43(10)  | O(8)-K(6)-O(13)      | 86.09(8)  |
| O(3)#22-K(4)-O(11)#9 | 109.92(11) | O(18)-K(6)-O(13)     | 50.40(8)  |
| O(4)#8-K(4)-O(11)#9  | 56.20(8)   | O(8)-K(6)-O(9)#11    | 73.40(8)  |
| O(4)#23-K(4)-O(11)#9 | 124.10(8)  | O(18)-K(6)-O(9)#11   | 134.94(8) |
| O(11)#5-K(4)-O(11)#9 | 179.33(19) | O(13)-K(6)-O(9)#11   | 84.58(8)  |
| O(3)-K(4)-O(14)#9    | 83.87(10)  | O(8)-K(6)-O(7)#18    | 50.18(8)  |
| O(3)#22-K(4)-O(14)#9 | 94.71(11)  | O(18)-K(6)-O(7)#18   | 85.97(8)  |
| O(4)#8-K(4)-O(14)#9  | 96.16(8)   | O(13)-K(6)-O(7)#18   | 111.84(9) |
| O(4)#23-K(4)-O(14)#9 | 84.41(7)   | O(9)#11-K(6)-O(7)#18 | 117.70(8) |
| O(11)#5-K(4)-O(14)#9 | 136.73(6)  | O(8)-K(6)-O(19)#8    | 129.35(8) |
| O(11)#9-K(4)-O(14)#9 | 43.26(6)   | O(18)-K(6)-O(19)#8   | 71.45(8)  |
| O(3)-K(4)-O(14)#5    | 94.71(11)  | O(13)-K(6)-O(19)#8   | 118.09(8) |
| O(3)#22-K(4)-O(14)#5 | 83.87(10)  | O(9)#11-K(6)-O(19)#8 | 145.91(8) |
| O(4)#8-K(4)-O(14)#5  | 84.41(7)   | O(7)#18-K(6)-O(19)#8 | 79.17(8)  |
| O(4)#23-K(4)-O(14)#5 | 96.16(8)   | O(8)-K(6)-O(20)#8    | 156.16(8) |
| O(11)#5-K(4)-O(14)#5 | 43.26(6)   | O(18)-K(6)-O(20)#8   | 97.59(8)  |
| O(11)#9-K(4)-O(14)#5 | 136.73(6)  | O(13)-K(6)-O(20)#8   | 117.24(8) |
| O(14)#9-K(4)-O(14)#5 | 178.45(19) | O(9)#11-K(6)-O(20)#8 | 102.44(8) |
| O(12)#8-K(5)-O(12)#9 | 106.92(7)  | O(7)#18-K(6)-O(20)#8 | 118.14(8) |
| O(12)#8-K(5)-O(12)   | 106.91(7)  | O(19)#8-K(6)-O(20)#8 | 45.65(7)  |
| O(12)#9-K(5)-O(12)   | 106.91(7)  | O(8)-K(6)-O(10)#11   | 98.62(8)  |

|                        |            |                       |            |
|------------------------|------------|-----------------------|------------|
| O(18)-K(6)-O(10)#11    | 157.77(8)  | O(20)-K(8)-O(7)       | 93.74(9)   |
| O(13)-K(6)-O(10)#11    | 122.76(8)  | O(20)#18-K(8)-O(7)    | 91.72(9)   |
| O(9)#11-K(6)-O(10)#11  | 44.49(7)   | O(7)#18-K(8)-O(7)     | 49.67(11)  |
| O(7)#18-K(6)-O(10)#11  | 114.33(8)  | O(19)-K(8)-O(6)#14    | 119.50(7)  |
| O(19)#8-K(6)-O(10)#11  | 102.30(8)  | O(19)#18-K(8)-O(6)#14 | 58.51(7)   |
| O(20)#8-K(6)-O(10)#11  | 65.55(7)   | O(20)-K(8)-O(6)#14    | 72.51(7)   |
| O(8)-K(7)-O(8)#12      | 101.91(7)  | O(20)#18-K(8)-O(6)#14 | 105.31(7)  |
| O(8)-K(7)-O(8)#11      | 101.91(7)  | O(7)#18-K(8)-O(6)#14  | 133.25(8)  |
| O(8)#12-K(7)-O(8)#11   | 101.91(7)  | O(7)-K(8)-O(6)#14     | 86.83(7)   |
| O(8)-K(7)-O(8)#24      | 126.50(12) | O(19)-K(8)-O(6)#19    | 58.51(7)   |
| O(8)#12-K(7)-O(8)#24   | 126.94(11) | O(19)#18-K(8)-O(6)#19 | 119.50(7)  |
| O(8)#11-K(7)-O(8)#24   | 52.52(11)  | O(20)-K(8)-O(6)#19    | 105.32(7)  |
| O(8)-K(7)-O(8)#25      | 126.93(12) | O(20)#18-K(8)-O(6)#19 | 72.51(7)   |
| O(8)#12-K(7)-O(8)#25   | 52.52(11)  | O(7)#18-K(8)-O(6)#19  | 86.83(7)   |
| O(8)#11-K(7)-O(8)#25   | 126.50(11) | O(7)-K(8)-O(6)#19     | 133.25(8)  |
| O(8)#24-K(7)-O(8)#25   | 101.91(7)  | O(6)#14-K(8)-O(6)#19  | 139.39(10) |
| O(8)-K(7)-O(8)#18      | 52.52(11)  | O(16)-B(1)-O(17)      | 121.3(4)   |
| O(8)#12-K(7)-O(8)#18   | 126.50(11) | O(16)-B(1)-O(20)      | 120.4(4)   |
| O(8)#11-K(7)-O(8)#18   | 126.94(12) | O(17)-B(1)-O(20)      | 118.4(3)   |
| O(8)#24-K(7)-O(8)#18   | 101.91(7)  | O(6)-B(2)-O(7)        | 119.9(4)   |
| O(8)#25-K(7)-O(8)#18   | 101.91(7)  | O(6)-B(2)-O(10)       | 121.6(4)   |
| O(8)-K(7)-B(5)         | 26.25(5)   | O(7)-B(2)-O(10)       | 118.5(3)   |
| O(19)-K(8)-O(19)#18    | 175.05(14) | O(15)-B(3)-O(13)      | 121.3(4)   |
| O(19)-K(8)-O(20)       | 50.28(8)   | O(15)-B(3)-O(14)      | 120.6(4)   |
| O(19)#18-K(8)-O(20)    | 129.39(8)  | O(13)-B(3)-O(14)      | 118.1(3)   |
| O(19)-K(8)-O(20)#18    | 129.39(8)  | O(1)-B(4)-O(2)        | 124.4(4)   |
| O(19)#18-K(8)-O(20)#18 | 50.27(8)   | O(1)-B(4)-O(5)        | 118.8(5)   |
| O(20)-K(8)-O(20)#18    | 173.99(15) | O(2)-B(4)-O(5)        | 116.8(4)   |
| O(19)-K(8)-O(7)#18     | 72.86(8)   | O(8)-B(5)-O(8)#18     | 108.8(5)   |
| O(19)#18-K(8)-O(7)#18  | 111.90(9)  | O(8)-B(5)-O(7)        | 111.58(15) |
| O(20)-K(8)-O(7)#18     | 91.72(9)   | O(8)#18-B(5)-O(7)     | 108.10(16) |
| O(20)#18-K(8)-O(7)#18  | 93.73(9)   | O(8)-B(5)-O(7)#18     | 108.12(16) |
| O(19)-K(8)-O(7)        | 111.91(9)  | O(8)#18-B(5)-O(7)#18  | 111.57(15) |
| O(19)#18-K(8)-O(7)     | 72.86(8)   | O(7)-B(5)-O(7)#18     | 108.7(5)   |

|                      |            |                   |            |
|----------------------|------------|-------------------|------------|
| O(4)-B(6)-O(3)       | 123.6(4)   | O(3)-B(8)-O(2)    | 110.99(16) |
| O(4)-B(6)-O(5)       | 118.2(4)   | O(3)#22-B(8)-O(2) | 108.00(17) |
| O(3)-B(6)-O(5)       | 118.1(4)   | O(2)#22-B(8)-O(2) | 110.3(5)   |
| O(12)-B(7)-O(13)     | 111.8(3)   | O(19)-B(9)-O(18)  | 125.1(4)   |
| O(12)-B(7)-O(17)     | 108.7(3)   | O(19)-B(9)-O(20)  | 116.3(4)   |
| O(13)-B(7)-O(17)     | 109.4(4)   | O(18)-B(9)-O(20)  | 118.6(4)   |
| O(12)-B(7)-O(18)     | 108.0(3)   | O(9)-B(10)-O(8)   | 123.5(4)   |
| O(13)-B(7)-O(18)     | 107.6(3)   | O(9)-B(10)-O(10)  | 119.0(3)   |
| O(17)-B(7)-O(18)     | 111.4(3)   | O(8)-B(10)-O(10)  | 117.4(3)   |
| O(3)-B(8)-O(3)#22    | 108.6(5)   | O(11)-B(11)-O(12) | 122.2(4)   |
| O(3)-B(8)-O(2)#22    | 108.01(17) | O(11)-B(11)-O(14) | 120.0(4)   |
| O(3)#22-B(8)-O(2)#22 | 110.99(16) | O(12)-B(11)-O(14) | 117.7(4)   |

Symmetry transformations used to generate equivalent atoms:

- |                                |                               |                               |
|--------------------------------|-------------------------------|-------------------------------|
| #1 $-y+2, x-y+1, z$            | #2 $-x+y+1, -x+2, z$          | #3 $x-y+1, -y+1, -z+1$        |
| #4 $y+1, x+1, -z+1$            | #5 $-x+1, -x+y+1, -z+1$       | #6 $x-y, -y, -z+1$            |
| #7 $y+1, x, -z+1$              | #8 $-y+1, x-y, z$             | #9 $-x+y+1, -x+1, z$          |
| #10 $y, x-1, -z+1$             | #11 $-x+y+1, -x, z$           | #12 $-y, x-y-1, z$            |
| #13 $-x+1, -x+y, -z+1$         | #14 $-y, x-y, z$              | #15 $-x+y, -x, z$             |
| #16 $y-1/3, x-2/3, -z+4/3$     | #17 $x-y+2/3, -y+1/3, -z+4/3$ |                               |
| #18 $-x+2/3, -x+y+1/3, -z+4/3$ | #19 $y+2/3, x+1/3, -z+4/3$    |                               |
| #20 $-x+2, -x+y+1, -z+1$       | #21 $x-y+1, -y+2, -z+1$       | #22 $y, x, -z+1$              |
| #23 $x-y, -y+1, -z+1$          | #24 $y+2/3, x-2/3, -z+4/3$    | #25 $x-y-1/3, -y-2/3, -z+4/3$ |
| #26 $y-1, x-1, -z+1$           |                               |                               |

**Table S5** Selected bond lengths (Å) and angles (deg.) for Rb<sub>21</sub>Sr<sub>3.8</sub>Sc<sub>5.2</sub>B<sub>45</sub>O<sub>90</sub>.

|               |           |                     |           |
|---------------|-----------|---------------------|-----------|
| Sc(1)-O(3)#1  | 2.175(9)  | Rb(2)-O(1)          | 2.855(3)  |
| Sc(1)-O(3)#2  | 2.175(9)  | Rb(2)-O(1)#4        | 2.855(3)  |
| Sc(1)-O(3)#3  | 2.175(9)  | Rb(2)-O(1)#5        | 2.855(3)  |
| Sr (1)-O(5)   | 2.202(3)  | Rb(2)-O(1)#12       | 2.855(3)  |
| Sr (1)-O(5)#4 | 2.202(3)  | Rb(2)-O(1)#14       | 2.855(3)  |
| Sr (1)-O(5)#5 | 2.202(3)  | Rb(3)-O(5)          | 2.847(3)  |
| Sr (1)-O(6)#1 | 2.606(9)  | Rb(3)-O(5)#15       | 2.847(3)  |
| Sr(1)-O(6)#2  | 2.606(9)  | Rb(3)-O(2)#1        | 2.947(3)  |
| Sr(1)-O(6)#3  | 2.606(9)  | Rb(3)-O(2)#7        | 2.947(3)  |
| Sc(2)-O(6)#6  | 2.084(9)  | Rb(3)-O(4)          | 2.994(19) |
| Sc(2)-O(6)#7  | 2.084(9)  | Rb(3)-O(4)#15       | 2.994(19) |
| Sc(2)-O(6)#8  | 2.084(9)  | Rb(3)-O(3)#3        | 3.177(11) |
| Sc(2)-O(6)#9  | 2.084(9)  | Rb(3)-O(3)#9        | 3.177(11) |
| Sc(2)-O(6)#10 | 2.084(9)  | Rb(3)-O(7)          | 3.42(3)   |
| Sc(2)-O(6)    | 2.084(9)  | Rb(3)-O(7)#15       | 3.42(3)   |
| Sr(2)-O(3)    | 2.468(8)  | O(1)-B(2)           | 1.357(5)  |
| Sr(2)-O(3)#6  | 2.468(8)  | O(1)-B(1)           | 1.459(4)  |
| Sr(2)-O(3)#7  | 2.468(8)  | O(2)-B(3)           | 1.359(6)  |
| Sr(2)-O(3)#8  | 2.468(8)  | O(2)-B(1)           | 1.472(4)  |
| Sr(2)-O(3)#9  | 2.468(8)  | O(3)-B(3)           | 1.393(10) |
| Sr(2)-O(3)#10 | 2.468(8)  | O(4)-B(2)           | 1.375(10) |
| Rb(1)-O(1)#7  | 2.798(3)  | O(4)-B(3)           | 1.457(15) |
| Rb(1)-O(1)    | 2.798(3)  | O(5)-B(2)           | 1.329(6)  |
| Rb(1)-O(5)#4  | 2.902(4)  | O(6)-B(3)           | 1.339(10) |
| Rb(1)-O(5)#11 | 2.902(4)  | O(7)-B(3)           | 1.26(3)   |
| Rb(1)-O(2)#12 | 2.989(3)  | O(7)-B(2)           | 1.53(3)   |
| Rb(1)-O(2)#1  | 2.989(3)  | O(3)#1-Sr(1)-O(3)#2 | 79.1(3)   |
| Rb(1)-O(7)#4  | 3.26(3)   | O(3)#1-Sr(1)-O(3)#3 | 79.1(3)   |
| Rb(1)-O(7)#11 | 3.26(3)   | O(3)#2-Sr(1)-O(3)#3 | 79.1(3)   |
| Rb(1)-O(4)#4  | 3.333(10) | O(3)#1-Sr(1)-O(5)   | 99.4(3)   |
| Rb(1)-O(4)#11 | 3.333(10) | O(3)#2-Sr(1)-O(5)   | 165.4(3)  |
| Rb(2)-O(1)#13 | 2.855(3)  | O(3)#3-Sr(1)-O(5)   | 86.3(3)   |



|                     |           |                      |          |
|---------------------|-----------|----------------------|----------|
| O(3)#1-Sr(1)-O(5)#4 | 86.3(3)   | O(6)#7-Sr(2)-O(6)#9  | 84.6(4)  |
| O(3)#2-Sr(1)-O(5)#4 | 99.4(3)   | O(6)#8-Sr(2)-O(6)#9  | 96.2(6)  |
| O(3)#3-Sr(1)-O(5)#4 | 165.4(3)  | O(6)#6-Sr(2)-O(6)#10 | 96.2(6)  |
| O(5)-Sr(1)-O(5)#4   | 94.96(10) | O(6)#7-Sr(2)-O(6)#10 | 94.6(6)  |
| O(3)#1-Sr(1)-O(5)#5 | 165.4(3)  | O(6)#8-Sr(2)-O(6)#10 | 84.6(4)  |
| O(3)#2-Sr(1)-O(5)#5 | 86.3(3)   | O(6)#9-Sr(2)-O(6)#10 | 178.8(7) |
| O(3)#3-Sr(1)-O(5)#5 | 99.4(3)   | O(6)#6-Sr(2)-O(6)    | 178.8(7) |
| O(5)-Sr(1)-O(5)#5   | 94.96(10) | O(6)#7-Sr(2)-O(6)    | 96.2(6)  |
| O(5)#4-Sr(1)-O(5)#5 | 94.96(10) | O(6)#8-Sr(2)-O(6)    | 84.6(4)  |
| O(3)#1-Sr(1)-O(6)#1 | 9.3(3)    | O(6)#9-Sr(2)-O(6)    | 94.6(6)  |
| O(3)#2-Sr(1)-O(6)#1 | 73.9(4)   | O(6)#10-Sr(2)-O(6)   | 84.6(4)  |
| O(3)#3-Sr(1)-O(6)#1 | 70.9(4)   | O(6)#6-Sr(2)-O(3)    | 168.7(3) |
| O(5)-Sr(1)-O(6)#1   | 102.5(3)  | O(6)#7-Sr(2)-O(3)    | 105.5(3) |
| O(5)#4-Sr(1)-O(6)#1 | 94.7(3)   | O(6)#8-Sr(2)-O(3)    | 75.2(4)  |
| O(5)#5-Sr(1)-O(6)#1 | 159.2(2)  | O(6)#9-Sr(2)-O(3)    | 100.8(3) |
| O(3)#1-Sr(1)-O(6)#2 | 70.9(4)   | O(6)#10-Sr(2)-O(3)   | 78.5(4)  |
| O(3)#2-Sr(1)-O(6)#2 | 9.3(3)    | O(6)-Sr(2)-O(3)      | 10.9(3)  |
| O(3)#3-Sr(1)-O(6)#2 | 73.9(4)   | O(6)#6-Sr(2)-O(3)#6  | 10.9(3)  |
| O(5)-Sr(1)-O(6)#2   | 159.2(2)  | O(6)#7-Sr(2)-O(3)#6  | 78.5(4)  |
| O(5)#4-Sr(1)-O(6)#2 | 102.5(3)  | O(6)#8-Sr(2)-O(3)#6  | 100.8(3) |
| O(5)#5-Sr(1)-O(6)#2 | 94.7(3)   | O(6)#9-Sr(2)-O(3)#6  | 75.2(4)  |
| O(6)#1-Sr(1)-O(6)#2 | 65.2(3)   | O(6)#10-Sr(2)-O(3)#6 | 105.5(3) |
| O(3)#1-Sr(1)-O(6)#3 | 73.9(4)   | O(6)-Sr(2)-O(3)#6    | 168.7(3) |
| O(3)#2-Sr(1)-O(6)#3 | 70.9(4)   | O(3)-Sr(2)-O(3)#6    | 174.2(5) |
| O(3)#3-Sr(1)-O(6)#3 | 9.3(3)    | O(6)#6-Sr(2)-O(3)#7  | 75.2(4)  |
| O(5)-Sr(1)-O(6)#3   | 94.7(3)   | O(6)#7-Sr(2)-O(3)#7  | 10.9(3)  |
| O(5)#4-Sr(1)-O(6)#3 | 159.2(2)  | O(6)#8-Sr(2)-O(3)#7  | 168.7(3) |
| O(5)#5-Sr(1)-O(6)#3 | 102.5(3)  | O(6)#9-Sr(2)-O(3)#7  | 78.5(4)  |
| O(6)#1-Sr(1)-O(6)#3 | 65.2(3)   | O(6)#10-Sr(2)-O(3)#7 | 100.8(3) |
| O(6)#2-Sr(1)-O(6)#3 | 65.2(3)   | O(6)-Sr(2)-O(3)#7    | 105.5(3) |
| O(6)#6-Sr(2)-O(6)#7 | 84.6(4)   | O(3)-Sr(2)-O(3)#7    | 115.4(4) |
| O(6)#6-Sr(2)-O(6)#8 | 94.6(6)   | O(3)#6-Sr(2)-O(3)#7  | 68.3(3)  |
| O(6)#7-Sr(2)-O(6)#8 | 178.8(7)  | O(6)#6-Sr(2)-O(3)#8  | 100.8(3) |
| O(6)#6-Sr(2)-O(6)#9 | 84.6(4)   | O(6)#7-Sr(2)-O(3)#8  | 168.7(3) |

|                       |            |                       |            |
|-----------------------|------------|-----------------------|------------|
| O(6)#8-Sr(2)-O(3)#8   | 10.9(3)    | O(1)#7-Rb(1)-O(2)#12  | 84.75(8)   |
| O(6)#9-Sr(2)-O(3)#8   | 105.5(3)   | O(1)-Rb(1)-O(2)#12    | 48.40(7)   |
| O(6)#10-Sr(2)-O(3)#8  | 75.2(4)    | O(5)#4-Rb(1)-O(2)#12  | 116.95(8)  |
| O(6)-Sr(2)-O(3)#8     | 78.5(4)    | O(5)#11-Rb(1)-O(2)#12 | 84.45(8)   |
| O(3)-Sr(2)-O(3)#8     | 68.3(3)    | O(1)#7-Rb(1)-O(2)#1   | 48.40(7)   |
| O(3)#6-Sr(2)-O(3)#8   | 108.4(5)   | O(1)-Rb(1)-O(2)#1     | 84.75(8)   |
| O(3)#7-Sr(2)-O(3)#8   | 174.2(5)   | O(5)#4-Rb(1)-O(2)#1   | 84.46(8)   |
| O(6)#6-Sr(2)-O(3)#9   | 78.5(4)    | O(5)#11-Rb(1)-O(2)#1  | 116.95(8)  |
| O(6)#7-Sr(2)-O(3)#9   | 75.2(4)    | O(2)#12-Rb(1)-O(2)#1  | 111.51(11) |
| O(6)#8-Sr(2)-O(3)#9   | 105.5(3)   | O(1)#7-Rb(1)-O(7)#4   | 165.4(5)   |
| O(6)#9-Sr(2)-O(3)#9   | 10.9(3)    | O(1)-Rb(1)-O(7)#4     | 98.2(5)    |
| O(6)#10-Sr(2)-O(3)#9  | 168.7(3)   | O(5)#4-Rb(1)-O(7)#4   | 48.0(6)    |
| O(6)-Sr(2)-O(3)#9     | 100.8(3)   | O(5)#11-Rb(1)-O(7)#4  | 98.4(5)    |
| O(3)-Sr(2)-O(3)#9     | 108.4(5)   | O(2)#12-Rb(1)-O(7)#4  | 108.0(6)   |
| O(3)#6-Sr(2)-O(3)#9   | 68.3(3)    | O(2)#1-Rb(1)-O(7)#4   | 128.5(6)   |
| O(3)#7-Sr(2)-O(3)#9   | 68.3(3)    | O(1)#7-Rb(1)-O(7)#11  | 98.2(5)    |
| O(3)#8-Sr(2)-O(3)#9   | 115.4(4)   | O(1)-Rb(1)-O(7)#11    | 165.4(5)   |
| O(6)#6-Sr(2)-O(3)#10  | 105.5(3)   | O(5)#4-Rb(1)-O(7)#11  | 98.4(5)    |
| O(6)#7-Sr(2)-O(3)#10  | 100.8(3)   | O(5)#11-Rb(1)-O(7)#11 | 48.0(6)    |
| O(6)#8-Sr(2)-O(3)#10  | 78.5(4)    | O(2)#12-Rb(1)-O(7)#11 | 128.5(6)   |
| O(6)#9-Sr(2)-O(3)#10  | 168.7(3)   | O(2)#1-Rb(1)-O(7)#11  | 108.0(6)   |
| O(6)#10-Sr(2)-O(3)#10 | 10.9(3)    | O(7)#4-Rb(1)-O(7)#11  | 68.5(9)    |
| O(6)-Sr(2)-O(3)#10    | 75.2(4)    | O(1)#7-Rb(1)-O(4)#4   | 159.4(3)   |
| O(3)-Sr(2)-O(3)#10    | 68.3(3)    | O(1)-Rb(1)-O(4)#4     | 100.74(18) |
| O(3)#6-Sr(2)-O(3)#10  | 115.4(4)   | O(5)#4-Rb(1)-O(4)#4   | 42.8(2)    |
| O(3)#7-Sr(2)-O(3)#10  | 108.4(5)   | O(5)#11-Rb(1)-O(4)#4  | 101.8(2)   |
| O(3)#8-Sr(2)-O(3)#10  | 68.3(3)    | O(2)#12-Rb(1)-O(4)#4  | 115.5(3)   |
| O(3)#9-Sr(2)-O(3)#10  | 174.2(5)   | O(2)#1-Rb(1)-O(4)#4   | 120.7(3)   |
| O(1)#7-Rb(1)-O(1)     | 95.70(12)  | O(7)#4-Rb(1)-O(4)#4   | 8.2(4)     |
| O(1)#7-Rb(1)-O(5)#4   | 132.83(8)  | O(7)#11-Rb(1)-O(4)#4  | 66.9(4)    |
| O(1)-Rb(1)-O(5)#4     | 75.25(8)   | O(1)#7-Rb(1)-O(4)#11  | 100.74(18) |
| O(1)#7-Rb(1)-O(5)#11  | 75.25(8)   | O(1)-Rb(1)-O(4)#11    | 159.4(3)   |
| O(1)-Rb(1)-O(5)#11    | 132.83(8)  | O(5)#4-Rb(1)-O(4)#11  | 101.8(2)   |
| O(5)#4-Rb(1)-O(5)#11  | 143.06(12) | O(5)#11-Rb(1)-O(4)#11 | 42.8(2)    |

|                       |            |                       |            |
|-----------------------|------------|-----------------------|------------|
| O(2)#12-Rb(1)-O(4)#11 | 120.7(3)   | O(4)-Rb(3)-O(4)#15    | 173.5(5)   |
| O(2)#1-Rb(1)-O(4)#11  | 115.5(3)   | O(5)-Rb(3)-O(3)#3     | 59.30(16)  |
| O(7)#4-Rb(1)-O(4)#11  | 66.9(3)    | O(5)#15-Rb(3)-O(3)#3  | 121.68(17) |
| O(7)#11-Rb(1)-O(4)#11 | 8.2(4)     | O(2)#1-Rb(3)-O(3)#3   | 85.15(16)  |
| O(4)#4-Rb(1)-O(4)#11  | 66.5(3)    | O(2)#7-Rb(3)-O(3)#3   | 131.44(16) |
| O(1)#13-Rb(2)-O(1)    | 125.23(10) | O(4)-Rb(3)-O(3)#3     | 103.7(2)   |
| O(1)#13-Rb(2)-O(1)#4  | 126.56(10) | O(4)#15-Rb(3)-O(3)#3  | 78.4(2)    |
| O(1)-Rb(2)-O(1)#4     | 103.96(6)  | O(5)-Rb(3)-O(3)#9     | 121.68(17) |
| O(1)#13-Rb(2)-O(1)#5  | 49.09(10)  | O(5)#15-Rb(3)-O(3)#9  | 59.30(16)  |
| O(1)-Rb(2)-O(1)#5     | 103.96(6)  | O(2)#1-Rb(3)-O(3)#9   | 131.44(16) |
| O(1)#4-Rb(2)-O(1)#5   | 103.96(6)  | O(2)#7-Rb(3)-O(3)#9   | 85.15(16)  |
| O(1)#13-Rb(2)-O(1)#12 | 103.96(6)  | O(4)-Rb(3)-O(3)#9     | 78.4(2)    |
| O(1)-Rb(2)-O(1)#12    | 49.09(10)  | O(4)#15-Rb(3)-O(3)#9  | 103.7(2)   |
| O(1)#4-Rb(2)-O(1)#12  | 125.23(10) | O(3)#3-Rb(3)-O(3)#9   | 143.2(3)   |
| O(1)#5-Rb(2)-O(1)#12  | 126.56(10) | O(5)-Rb(3)-O(7)       | 46.4(4)    |
| O(1)#13-Rb(2)-O(1)#14 | 103.96(6)  | O(5)#15-Rb(3)-O(7)    | 133.6(5)   |
| O(1)-Rb(2)-O(1)#14    | 126.55(10) | O(2)#1-Rb(3)-O(7)     | 90.1(5)    |
| O(1)#4-Rb(2)-O(1)#14  | 49.09(10)  | O(2)#7-Rb(3)-O(7)     | 90.9(5)    |
| O(1)#5-Rb(2)-O(1)#14  | 125.23(10) | O(4)-Rb(3)-O(7)       | 3.8(6)     |
| O(1)#12-Rb(2)-O(1)#14 | 103.96(6)  | O(4)#15-Rb(3)-O(7)    | 177.3(6)   |
| O(5)-Rb(3)-O(5)#15    | 177.34(14) | O(3)#3-Rb(3)-O(7)     | 102.4(5)   |
| O(5)-Rb(3)-O(2)#1     | 71.32(9)   | O(3)#9-Rb(3)-O(7)     | 77.2(5)    |
| O(5)#15-Rb(3)-O(2)#1  | 106.14(9)  | O(5)-Rb(3)-O(7)#15    | 133.6(5)   |
| O(5)-Rb(3)-O(2)#7     | 106.14(9)  | O(5)#15-Rb(3)-O(7)#15 | 46.4(4)    |
| O(5)#15-Rb(3)-O(2)#7  | 71.32(9)   | O(2)#1-Rb(3)-O(7)#15  | 90.9(5)    |
| O(2)#1-Rb(3)-O(2)#7   | 47.91(11)  | O(2)#7-Rb(3)-O(7)#15  | 90.1(5)    |
| O(5)-Rb(3)-O(4)       | 46.49(17)  | O(4)-Rb(3)-O(7)#15    | 177.3(6)   |
| O(5)#15-Rb(3)-O(4)    | 133.30(17) | O(4)#15-Rb(3)-O(7)#15 | 3.8(6)     |
| O(2)#1-Rb(3)-O(4)     | 86.6(2)    | O(3)#3-Rb(3)-O(7)#15  | 77.2(5)    |
| O(2)#7-Rb(3)-O(4)     | 87.4(3)    | O(3)#9-Rb(3)-O(7)#15  | 102.4(5)   |
| O(5)-Rb(3)-O(4)#15    | 133.30(17) | O(7)-Rb(3)-O(7)#15    | 178.9(11)  |
| O(5)#15-Rb(3)-O(4)#15 | 46.49(17)  | O(1)-B(1)-O(1)#12     | 108.7(5)   |
| O(2)#1-Rb(3)-O(4)#15  | 87.4(2)    | O(1)-B(1)-O(2)        | 111.23(16) |
| O(2)#7-Rb(3)-O(4)#15  | 86.6(2)    | O(1)#12-B(1)-O(2)     | 108.47(15) |

|                      |            |                |           |
|----------------------|------------|----------------|-----------|
| O(1)-B(1)-O(2)#12    | 108.47(15) | O(7)-B(3)-O(2) | 115.0(12) |
| O(1)#12-B(1)-O(2)#12 | 111.23(16) | O(6)-B(3)-O(2) | 129.4(7)  |
| O(2)-B(1)-O(2)#12    | 108.8(5)   | O(7)-B(3)-O(3) | 126.8(14) |
| O(5)-B(2)-O(1)       | 123.6(4)   | O(6)-B(3)-O(3) | 24.3(3)   |
| O(5)-B(2)-O(4)       | 117.2(6)   | O(2)-B(3)-O(3) | 112.1(6)  |
| O(1)-B(2)-O(4)       | 119.1(6)   | O(7)-B(3)-O(4) | 18.4(12)  |
| O(5)-B(2)-O(7)       | 123.6(11)  | O(6)-B(3)-O(4) | 110.2(7)  |
| O(1)-B(2)-O(7)       | 111.2(11)  | O(2)-B(3)-O(4) | 119.0(5)  |
| O(4)-B(2)-O(7)       | 17.8(8)    | O(3)-B(3)-O(4) | 128.7(7)  |
| O(7)-B(3)-O(6)       | 115.3(14)  |                |           |

Symmetry transformations used to generate equivalent atoms:

- #1  $-y+5/3, x-y+1/3, z+1/3$       #2  $x-1/3, y-2/3, z+1/3$       #3  $-x+y+2/3, -x+4/3, z+1/3$   
#4  $-x+y+1, -x+1, z$       #5  $-y+1, x-y, z$       #6  $x-y+1, -y+2, -z+1$   
#7  $-x+2, -x+y+1, -z+1$       #8  $-x+y+1, -x+2, z$       #9  $y, x, -z+1$   
#10  $-y+2, x-y+1, z$       #11  $x-y+1, -y+1, -z+1$       #12  $y+1/3, x-1/3, -z+2/3$   
#13  $-x+4/3, -x+y+2/3, -z+2/3$       #14  $x-y+1/3, -y+2/3, -z+2/3$   
#15  $x-y+2/3, -y+4/3, -z+4/3$       #16  $-x+y+4/3, -x+5/3, z-1/3$       #17  $x+1/3, y+2/3, z-1/3$   
#18  $-y+4/3, x-y+2/3, z-1/3$

**Table S6** Direction and magnitude of the dipole moments in  $K_7BaSc_2B_{15}O_{30}$  and  $Rb_{21}Sr_{3.8}Sc_{5.2}B_{45}O_{90}$  compounds.

| Compounds                             | Species                | Dipole moment (Debye) |         |         | Dipole moment |
|---------------------------------------|------------------------|-----------------------|---------|---------|---------------|
|                                       |                        | x                     | y       | z       | (Debye)       |
| $K_7BaSc_2B_{15}O_{30}$               | $Ba_{(1)}O_6$          | -0.0016               | -0.0007 | 5.6541  | 5.6541        |
|                                       | $Ba_{(2)}O_6$          | -0.0002               | 0.0004  | 0.3257  | 0.3257        |
|                                       | $Sc_{(1)}O_6$          | -0.0014               | 0.0002  | 4.9072  | 4.9072        |
|                                       | $Sc_{(2)}O_6$          | -0.0050               | 0.0024  | 3.9639  | 3.9639        |
|                                       | $Sc_{(3)}O_6$          | -0.0069               | 0.0058  | 2.8012  | 2.8012        |
|                                       | $Sc_{(4)}O_6$          | -0.0016               | 0.0016  | -5.7993 | 5.7993        |
|                                       | $B_{(1)}O_3$           | -0.7501               | 0.4855  | 0.0355  | 0.8942        |
|                                       | $B_{(2)}O_3$           | 0.0560                | 0.6326  | 0.0137  | 0.6353        |
|                                       | $B_{(3)}O_3$           | -0.7798               | 0.5130  | 0.1746  | 0.9496        |
|                                       | $B_{(4)}O_3$           | -0.9343               | 0.7944  | 0.8115  | 1.4705        |
|                                       | $B_{(5)}O_4$           | 0.0234                | -0.0402 | -0.0009 | 0.0466        |
|                                       | $B_{(6)}O_3$           | -0.3946               | 0.2110  | 1.0869  | 1.1754        |
|                                       | $B_{(7)}O_4$           | -0.0989               | 0.3559  | -0.3518 | 0.5101        |
|                                       | $B_{(8)}O_4$           | 0.1409                | 0.2437  | -0.0001 | 0.2815        |
|                                       | $B_{(9)}O_3$           | -0.7252               | 1.2098  | -0.0495 | 1.4114        |
|                                       | $B_{(10)}O_3$          | -0.6999               | 0.7551  | 0.5551  | 1.1697        |
| $B_{(11)}O_3$                         | -0.5195                | 0.4620                | 0.5269  | 0.8723  |               |
| $Rb_{21}Sr_{3.8}Sc_{5.2}B_{45}O_{90}$ | $Sc_{(1)}/Sr_{(1)}O_6$ | 0.0001                | -0.0015 | -3.9248 | 3.9248        |
|                                       |                        | 0.0001                | -0.0026 | -2.5963 | 2.5963        |
|                                       | $Sc_{(2)}/Sr_{(2)}O_6$ | -0.0008               | -0.0003 | 0.0008  | 0.0011        |
|                                       |                        | 0.0000                | 0.0000  | 0.0000  | 0.0000        |
|                                       | $B_{(1)}O_4$           | -0.0786               | 0.1596  | -0.0005 | 0.1778        |
|                                       | $B_{(2)}O_3$           | -0.8827               | 0.7159  | -0.6337 | 1.3013        |
|                                       |                        | -0.9967               | -1.1379 | 3.5073  | 3.8196        |
|                                       | $B_{(3)}O_3$           | 0.5257                | 0.1915  | -2.0814 | 2.1553        |
| 0.5378                                |                        | 2.2801                | -0.0886 | 2.3443  |               |

**Table S7** Distortion direction and eccentricity degree ( $\Delta d$ ) of the dipole moments in the Ba/SrO<sub>6</sub> and ScO<sub>6</sub> octahedra.

| compounds                                                                            | type of octahedron                                  | distortion direction | $\Delta d$ |
|--------------------------------------------------------------------------------------|-----------------------------------------------------|----------------------|------------|
| K <sub>7</sub> BaSc <sub>2</sub> B <sub>15</sub> O <sub>30</sub>                     | Ba <sub>(1)</sub> O <sub>6</sub>                    | C3                   | 0.9327     |
|                                                                                      | Ba <sub>(2)</sub> O <sub>6</sub>                    | C3                   | 0.0977     |
|                                                                                      | Sc <sub>(1)</sub> O <sub>6</sub>                    | C3                   | 0.1201     |
|                                                                                      | Sc <sub>(2)</sub> O <sub>6</sub>                    | C3                   | 0.2521     |
|                                                                                      | Sc <sub>(3)</sub> O <sub>6</sub>                    | C3                   | 0.3277     |
|                                                                                      | Sc <sub>(4)</sub> O <sub>6</sub>                    | C3                   | 0.6511     |
| Rb <sub>21</sub> Sr <sub>3.8</sub> Sc <sub>5.2</sub> B <sub>45</sub> O <sub>90</sub> | Sc <sub>(1)</sub> /Sr <sub>(1)</sub> O <sub>6</sub> | C3                   | 0.0846     |
|                                                                                      |                                                     | C3                   | 1.2455     |
|                                                                                      | Sc <sub>(2)</sub> /Sr <sub>(2)</sub> O <sub>6</sub> | undistorted          | 0          |
|                                                                                      |                                                     | undistorted          | 0          |

The magnitude of the out-of-center distortion:  $\Delta d = |(A-O1) - (A-O4)|/|\cos\theta1| + |(A-O2) - (A-O5)|/|\cos\theta2| + |(A-O3) - (A-O6)|/|\cos\theta3|$ .

**Table S8** The investigation of B-O bond lengths in BO<sub>3</sub> units for the inorganic metal borates.

| No. | Compounds                                                                                                          | space groups                                                       | range of B-O bond lengths |
|-----|--------------------------------------------------------------------------------------------------------------------|--------------------------------------------------------------------|---------------------------|
| 1   | KBBF <sup>10</sup>                                                                                                 | <i>R32</i>                                                         | 1.37                      |
| 2   | $\beta$ -BBO <sup>11</sup>                                                                                         | <i>R</i> $\bar{3}c$                                                | 1.32-1.41                 |
| 3   | LBO <sup>12</sup>                                                                                                  | <i>Pna2</i> <sub>1</sub>                                           | 1.35-1.4                  |
| 4   | CsB <sub>3</sub> O <sub>5</sub> <sup>13</sup>                                                                      | <i>P2</i> <sub>1</sub> <i>2</i> <sub>1</sub> <i>2</i> <sub>1</sub> | 1.35-1.4                  |
| 5   | $\beta$ -Rb <sub>2</sub> Al <sub>2</sub> B <sub>2</sub> O <sub>7</sub> <sup>14</sup>                               | <i>P321</i>                                                        | 1.317                     |
| 6   | Sr <sub>2</sub> Be <sub>2</sub> B <sub>2</sub> O <sub>7</sub> <sup>15</sup>                                        | <i>P</i> $\bar{6}c2$                                               | 1.38                      |
| 7   | Bi <sub>3</sub> TeBO <sub>9</sub> <sup>16</sup>                                                                    | <i>P6</i> <sub>3</sub>                                             | 1.378                     |
| 8   | Pb <sub>2</sub> Ba <sub>3</sub> (BO <sub>3</sub> ) <sub>3</sub> Cl <sup>17</sup>                                   | <i>C222</i> <sub>1</sub>                                           | 1.378-1.393               |
| 9   | Ba <sub>3</sub> La <sub>4</sub> O <sub>4</sub> (BO <sub>3</sub> ) <sub>3</sub> Cl <sup>18</sup>                    | <i>P6</i> <sub>3</sub>                                             | 1.373-1.403               |
| 10  | Mg <sub>3</sub> B <sub>7</sub> O <sub>13</sub> Cl <sup>19</sup>                                                    | <i>Pca2</i> <sub>1</sub>                                           | 1.371                     |
| 11  | K <sub>5</sub> Mg <sub>2</sub> La <sub>3</sub> (BO <sub>3</sub> ) <sub>6</sub> <sup>20</sup>                       | <i>P3</i> <sub>1</sub> <i>m</i>                                    | 1.364-1.377               |
| 12  | KNa <sub>2</sub> La <sub>2</sub> (BO <sub>3</sub> ) <sub>3</sub> <sup>21</sup>                                     | <i>Amm2</i>                                                        | 1.361-1.41                |
| 13  | CsLiB <sub>6</sub> O <sub>10</sub> <sup>22</sup>                                                                   | <i>I</i> $\bar{4}2d$                                               | 1.36-1.4                  |
| 14  | Pb <sub>2</sub> BO <sub>3</sub> I <sup>23</sup>                                                                    | <i>P321</i>                                                        | 1.357                     |
| 15  | Sr <sub>2</sub> B <sub>10</sub> O <sub>14</sub> F <sub>6</sub> <sup>24</sup>                                       | <i>Cmc2</i> <sub>1</sub>                                           | 1.354-1.379               |
| 16  | Ca <sub>2</sub> B <sub>10</sub> O <sub>14</sub> F <sub>6</sub> <sup>24</sup>                                       | <i>Cmc2</i> <sub>1</sub>                                           | 1.353-1.371               |
| 17  | Li <sub>4</sub> Sr(BO <sub>3</sub> ) <sub>2</sub> <sup>25</sup>                                                    | <i>Cc</i>                                                          | 1.35-1.396                |
| 18  | Ba <sub>3</sub> Mg <sub>3</sub> (BO <sub>3</sub> ) <sub>3</sub> F <sub>3</sub> <sup>26</sup>                       | <i>P</i> $\bar{6}2m$                                               | 1.349-1.381               |
| 19  | CsKB <sub>8</sub> O <sub>12</sub> F <sub>2</sub> <sup>27</sup>                                                     | <i>P321</i>                                                        | 1.343-1.391               |
| 20  | Rb <sub>3</sub> Al <sub>3</sub> B <sub>3</sub> O <sub>10</sub> F <sup>28</sup>                                     | <i>P31c</i>                                                        | 1.305-1.405               |
| 21  | BiB <sub>3</sub> O <sub>6</sub> <sup>29</sup>                                                                      | <i>C2</i>                                                          | 1.34-1.4                  |
| 22  | CsAlB <sub>3</sub> O <sub>6</sub> F <sup>30</sup>                                                                  | <i>Pna2</i> <sub>1</sub>                                           | 1.339-1.391               |
| 23  | K <sub>7</sub> PbGd <sub>2</sub> B <sub>15</sub> O <sub>30</sub> <sup>31</sup>                                     | <i>R32</i>                                                         | 1.337-1.398               |
| 24  | NaRb <sub>6</sub> CaY <sub>2</sub> B <sub>15</sub> O <sub>30</sub> <sup>32</sup>                                   | <i>R32</i>                                                         | 1.335-1.398               |
| 25  | K <sub>7.5</sub> Gd <sub>2.5</sub> B <sub>15</sub> O <sub>30</sub> <sup>33</sup>                                   | <i>R32</i>                                                         | 1.332-1.398               |
| 26  | Cs <sub>2</sub> La <sub>2</sub> B <sub>10</sub> O <sub>17</sub> Cl <sub>4</sub> <sup>34</sup>                      | <i>Cm</i>                                                          | 1.336-1.385               |
| 27  | Rb <sub>3</sub> B <sub>11</sub> P <sub>2</sub> O <sub>23</sub> <sup>35</sup>                                       | <i>P1</i>                                                          | 1.335-1.399               |
| 28  | K <sub>7</sub> Pb <sub>0.23</sub> Zn <sub>0.77</sub> Lu <sub>2</sub> B <sub>15</sub> O <sub>30</sub> <sup>31</sup> | <i>R32</i>                                                         | 1.332-1.405               |
| 29  | K <sub>7</sub> Cd <sub>0.85</sub> Pb <sub>0.15</sub> Lu <sub>2</sub> B <sub>15</sub> O <sub>30</sub> <sup>31</sup> | <i>R32</i>                                                         | 1.332-1.41                |
| 30  | K <sub>7</sub> CdGd <sub>2</sub> B <sub>15</sub> O <sub>30</sub> <sup>31</sup>                                     | <i>R32</i>                                                         | 1.329-1.393               |
| 31  | Rb <sub>7</sub> CaY <sub>2</sub> B <sub>15</sub> O <sub>30</sub> <sup>32</sup>                                     | <i>R32</i>                                                         | 1.328-1.419               |
| 32  | K <sub>7</sub> CdY <sub>2</sub> B <sub>15</sub> O <sub>30</sub> <sup>31</sup>                                      | <i>R32</i>                                                         | 1.326-1.41                |
| 33  | K <sub>7</sub> BaY <sub>2</sub> B <sub>15</sub> O <sub>30</sub> <sup>33</sup>                                      | <i>R32</i>                                                         | 1.326-1.41                |
| 34  | K <sub>7.5</sub> Y <sub>2.5</sub> B <sub>15</sub> O <sub>30</sub> <sup>33</sup>                                    | <i>R32</i>                                                         | 1.324-1.388               |
| 35  | K <sub>7</sub> BaLu <sub>2</sub> B <sub>15</sub> O <sub>30</sub> <sup>33</sup>                                     | <i>R32</i>                                                         | 1.322-1.424               |
| 36  | K <sub>7</sub> ZnSc <sub>2</sub> B <sub>15</sub> O <sub>30</sub> <sup>31</sup>                                     | <i>R32</i>                                                         | 1.321-1.405               |
| 37  | K <sub>7</sub> SrY <sub>2</sub> B <sub>15</sub> O <sub>30</sub> <sup>33</sup>                                      | <i>R32</i>                                                         | 1.321-1.399               |

|           |                                              |               |             |
|-----------|----------------------------------------------|---------------|-------------|
| 38        | $K_7CaLu_2B_{15}O_{30}^{33}$                 | <i>R32</i>    | 1.321-1.406 |
| 39        | $K_7CdSc_2B_{15}O_{30}^{31}$                 | <i>R32</i>    | 1.32-1.413  |
| 40        | $K_7Pb_{0.31}Zn_{0.69}Gd_2B_{15}O_{30}^{31}$ | <i>R32</i>    | 1.32-1.399  |
| 41        | $K_7CaY_2B_{15}O_{30}^{33}$                  | <i>R32</i>    | 1.32-1.396  |
| 42        | $LiRb_6CaY_2B_{15}O_{30}^{32}$               | <i>R32</i>    | 1.32-1.421  |
| 43        | $K_7PbBi_2B_{15}O_{30}^{33}$                 | <i>R32</i>    | 1.319-1.432 |
| 44        | $K_7SrBi_2B_{15}O_{30}^{33}$                 | <i>R32</i>    | 1.318-1.393 |
| 45        | $K_7CaGd_2B_{15}O_{30}^{33}$                 | <i>R32</i>    | 1.317-1.4   |
| 46        | $K_7PbY_2B_{15}O_{30}^{31}$                  | <i>R32</i>    | 1.315-1.4   |
| 47        | $K_7SrGd_2B_{15}O_{30}^{33}$                 | <i>R32</i>    | 1.315-1.4   |
| 48        | $Li_4Rb_3B_7O_{14}^{36}$                     | <i>P3_121</i> | 1.315-1.435 |
| 49        | $K_7SrLu_2B_{15}O_{30}^{33}$                 | <i>R32</i>    | 1.314-1.403 |
| 50        | $Li_2B_6O_9F_2^{37}$                         | <i>Cc</i>     | 1.314-1.41  |
| 51        | $K_7Pb_{0.11}Cd_{0.89}Lu_2B_{15}O_{30}^{17}$ | <i>R32</i>    | 1.312-1.409 |
| 52        | $K_7CdLu_2B_{15}O_{30}^{31}$                 | <i>R32</i>    | 1.303-1.42  |
| 53        | $K_7PbSc_2B_{15}O_{30}^{31}$                 | <i>R32</i>    | 1.3-1.4     |
| 54        | $Cs_3Zn_6B_9O_{21}^{38}$                     | <i>Cmc2_1</i> | 1.284-1.407 |
| this work | KBSBO                                        | <i>R32</i>    | 1.32-1.411  |
| this work | RSSBO                                        | <i>R32</i>    | 1.26-1.53   |



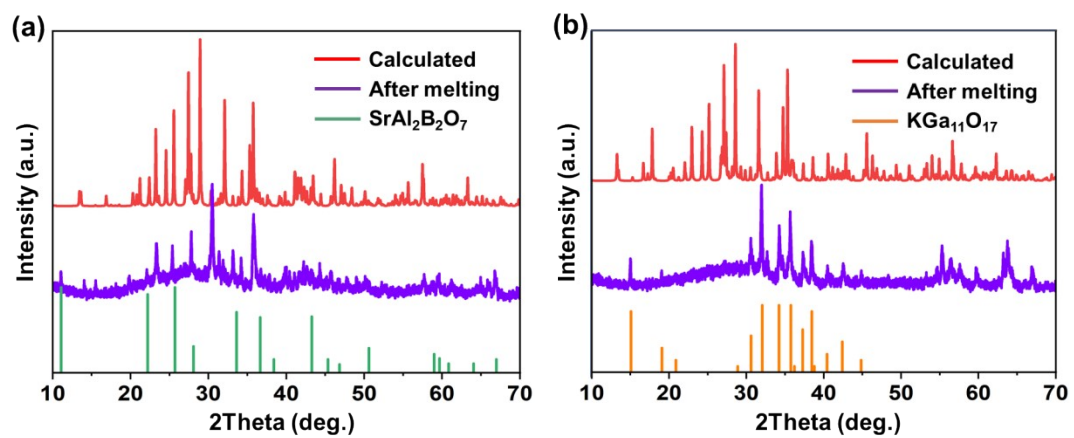

**Fig. S1** (a-b) Powder X-ray diffraction patterns results for melted  $\text{K}_7\text{BaSc}_2\text{B}_{15}\text{O}_{30}$  and  $\text{Rb}_{21}\text{Sr}_{3.8}\text{Sc}_{5.2}\text{B}_{45}\text{O}_{90}$ , respectively.

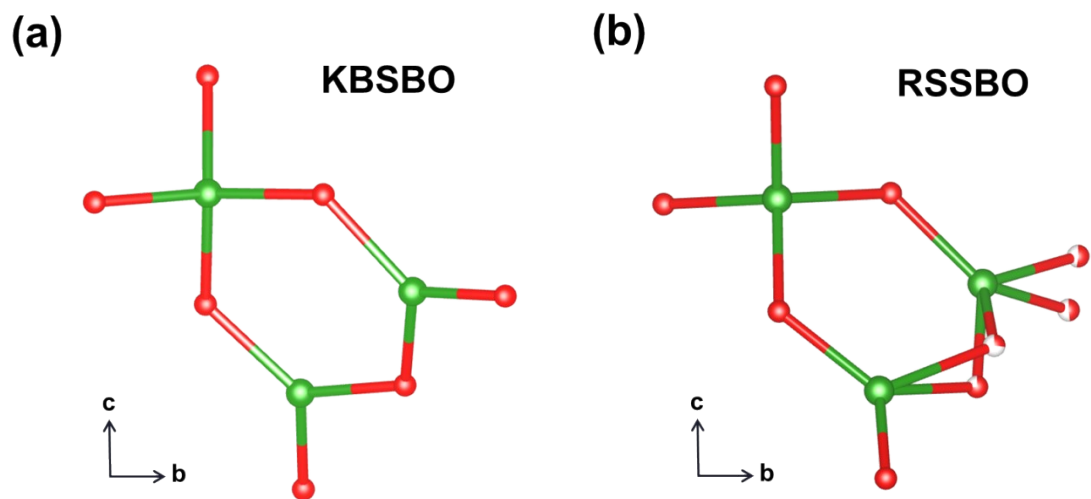

**Fig. S2** (a-b) The partial enlargement of  $B_5O_{10}$  units in KBSBO and RSSBO, respectively.

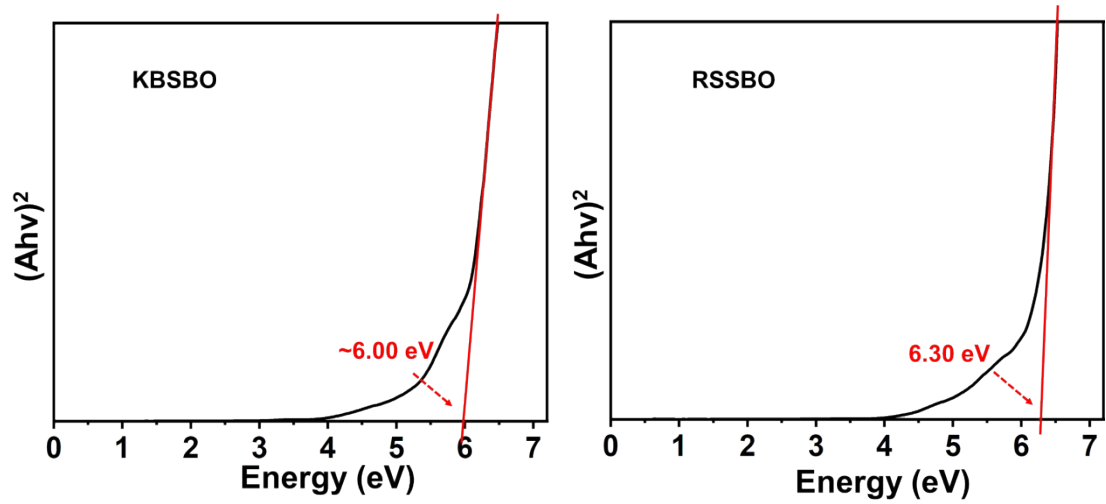

**Fig. S3** (a-b) The optical band gap values for KBSBO and RSSBO by Tauc plots absorption spectrometry, respectively.

## REFERENCES

- 1 G. M. Sheldrick, *Acta Crystallogr. Sect. A Found. Crystallogr.*, 2015, **71**, 3-8.
- 2 A. L. Spek, *J. Appl. Crystallogr.*, 2003, **36**, 7-13.
- 3 P. Kubelka and F. Munk, *Z. Technol. Phys.*, 1931, **12**, 593-601.
- 4 Y. H. She, F. Liang, J. M. Jiao, W. L. Zhao, N. Ye, Z. G. Hu, Y. C. Wu and C. G. Li, *Inorg. Chem. Front.*, 2023, **10**, 3595-3604.
- 5 S. K. Kurtz and T. T. Perry, *J. Appl. Phys.*, 1968, **39**, 3798-3813.
- 6 S. J. Clark, M. D. Segall, C. J. Pickard, P. J. Hasnip, M. J. Probert, K. Refson and M. C. Payne, *Z. Kristallogr. - Cryst. Mater.*, 2005, **220**, 567.
- 7 V. Milman, K. Refson, S. J. Clark, C. J. Pickard, J. R. Yates, S. P. Gao, P. J. Hasnip, M. I. J. Probert, A. Perlov and Segall, M. D., *J. Mol. Struct., THEOCHEM.* 2010, **954**, 22-35.
- 8 W. Kohn, *Rev. Mod. Phys.*, 1999, **71**, 1253-1266.
- 9 H. J. Monkhorst and J. D. Pack, *Matter Mater. Phys.*, 1976, **13**, 5188-5192.
- 10 X. Y. Wang, X. Yan, S. Y. Luo and C. T. Chen, *J. Cryst. Growth*, 2011, **318**, 610-612.
- 11 C. T. Chen, B. C. Wu, A. D. Jiang and G. M. You, *Sci. Sin. B*, 1985, **28**, 235.
- 12 C. T. Chen, Y. C. Wu, A. D. Jiang, B. C. Wu, G. You, R. K. Li and S. J. Lin, *J. Opt. Soc. Am. B*, 1989, **6**, 616-621.
- 13 Y. Kagebayashi, Y. Mori and T. Sasaki, *Bull. Mater. Sci.*, 1999, **22**, 971-973.
- 14 T. T. Tran, N. Z. Koocher, J. M. Rondinelli and P. S. Halasyamani, *Angew. Chem.*, 2017, **129**, 3015-3019.
- 15 C. Chen, Y. Wang, B. Wu, K. Wu, W. Zeng and L. Yu, *Nature*, 1995, **373**, 322-324.
- 16 M. J. Xia, X. X. Jiang, Z. S. Lin and R. K. Li, *J. Am. Chem. Soc.*, 2016, **138**, 14190-14193.
- 17 X. Y. Dong, Q. Jing, Y. J. Shi, Z. H. Yang, S. L. Pan, K. R. Poeppelmeier, J. Young, and J. M. Rondinelli, *J. Am. Chem. Soc.*, 2015, **137**, 9417-9422.
- 18 B. Q. Yuan, H. P. Wu, Z. G. Hu, J. Y. Wang, Y. C. Wu and H. W. Yu, *Chem. Mater.*, 2022, **34**, 8004-8012.
- 19 Z. J. Wang, H. M. Qiao, R. B. Su, B. Hu, X. M. Yang, C. He and X. F. Long, *Adv. Funct. Mater.*, 2018, **28**, 1804089.
- 20 R. Liu, H. Wu, H. Yu, Z. Hu, J. Wang and Y. Wu, *Chem. Mater.*, 2021, **33**, 4240-4246.
- 21 J. Song, C. Li, J. Jiao, Y. She, W. Zhao, F. Liang, N. Ye, Z. Hu and Y. Wu, *Inorg. Chem. Front.*, 2023, **10**, 5488-5495.
- 22 I. Shoji, H. Nakamura, R. Ito, T. Kondo, M. Yoshimura, Y. Mori and T. Sasaki, *J. Opt. Soc. Am. B*, 2001, **18**, 302-307.
- 23 H. W. Yu, N. Z. Koocher, J. M. Rondinelli and P. S. Halasyamani, *Angew. Chem., Int. Ed.*, 2018, **57**, 6100-6103.
- 24 M. Luo, F. Liang, Y. X. Song, D. Zhao, F. Xu, N. Ye and Z. S. Lin, *J. Am. Chem. Soc.*, 2018, **140**, 3884-3887.
- 25 S. G. Zhao, P. F. Gong, L. Bai, X. Xu, S. Q. Zhang, Z. H. Sun, Z. S. Lin, M. C. Hong, C. T. Chen and J. H. Luo, *Nat. Commun.*, 2014, **5**, 4019.
- 26 M. Mutailipu, M. Zhang, H. P. Wu, Z. H. Yang, Y. H. Shen, J. L. Sun and S. L. Pan, *Nat. Commun.*, 2018, **9**, 3089.
- 27 Y. Wang, B. B. Zhang, Z. H. Yang and S. L. Pan, *Angew. Chem., Int. Ed.*, 2018, **57**, 2150-2154.
- 28 S. G. Zhao, P. F. Gong, S. Y. Luo, S. J. Liu, L. N. Li, M. A. Asghar, T. K. Hong, Z. S. Lin and J. H. Luo, *J. Am. Chem. Soc.*, 2015, **137**, 2207-2210.

- 29 J. S. Knyrim, P. Becker, D. Johrendt and H. Huppertz, *Angew. Chem., Int. Ed.* **2006**, *45*, 8239-8241.
- 30 H. K. Liu, Y. Wang, B. B. Zhang, Z. H. Yang and S. L. Pan, *Chem. Sci.*, 2020, **11**, 694.
- 31 Z. Xie, M. Mutailipu, G. He, G. Han, Y. Wang, Z. Yang, M. Zhang and Pan, S. *Chem. Mater.*, 2018, **30**, 2414-2423.
- 32 C. Wu, Y. Dang, J. Chen, X. Hou and H. Shi, *Cryst. Growth Des.*, 2023, **23**, 6885-6893.
- 33 M. Mutailipu, Z. Xie, X. Su, M. Zhang, Y. Wang, Z. Yang, M. Janjua and S. Pan, *J. Am. Chem. Soc.*, 2017, **139**, 18397-18405.
- 34 X. P. Shi, A. Tudi, M. Q. Gai, Z. H. Yang, S. J. Han and S. L. Pan, *Chem. Mater.*, 2023, **35**, 5680-5688.
- 35 H. N. Liu, H. P. Wu, Z. G. Hu, J. Y. Wang, Y. C. Wu, P. S. Halasyamani and H. W. Yu, *ACS Mater. Lett.*, 2023, **5**, 155-161.
- 36 Y. Yang, S. L. Pan, H. Y. Li, J. Han, Z. H. Chen, W. W. Zhao and Z. X. Zhou, *Inorg. Chem.* 2011, **50**, 2415-2419.
- 37 T. Pilz and M. Jansen, *Z. Anorg. Allg. Chem.*, 2011, **637**, 2148-2152.
- 38 H. Yu, H. Wu, S. Pan, Z. Yang, X. Hou, X. Su, Q. Jing, K. R. Poeppelmeier and J. M. Rondinelli, *J. Am. Chem. Soc.*, 2014, **136**, 1264-1267.
